# Supplementary material
Source: publisher figshare collection journal article supplement (https://karger.figshare.com/ndownloader/files/40882481)

**Figure legend**

Supplemental Figure. CONSORT flow chart of the study.

**Supplemental Figure**


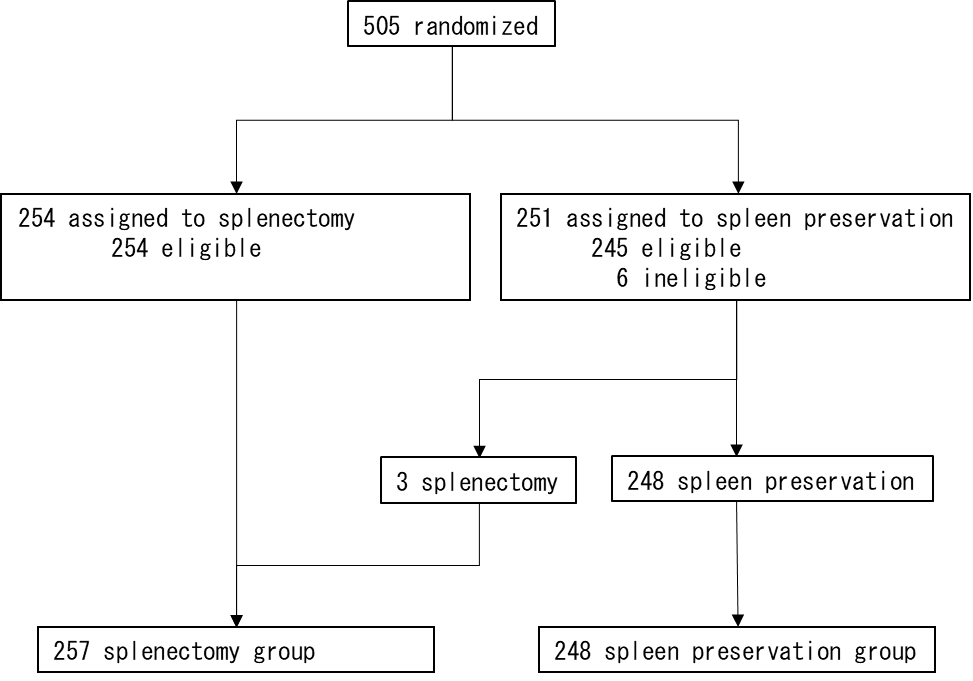

Supplement: Supplementary file 1 [file 40882481]
